# Supplementary material for: FIONA1-mediated methylation of the 3’UTR of FLC affects FLC transcript levels and flowering in Arabidopsis
Source: PubMed Central journal article supplement (PMC9543952; doi:10.1371/journal.pgen.1010386), 2022-09-27
Supplement: pgen.1010386.s001.pdf [file pgen.1010386.s001.pdf]

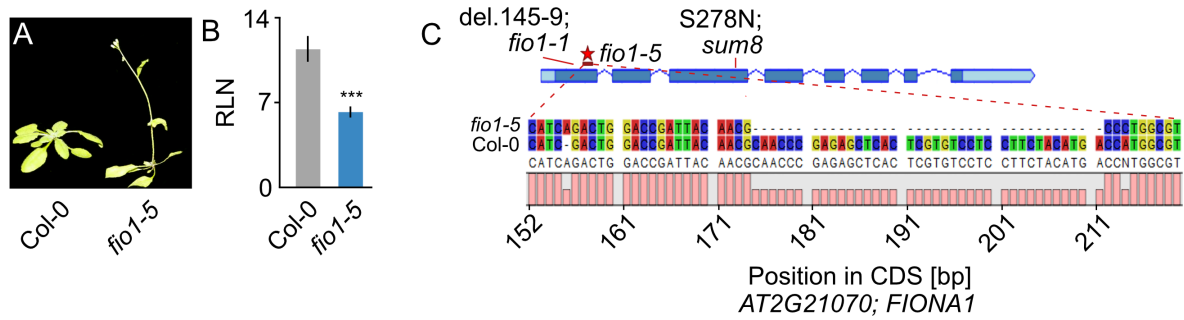

### Figure S1 – CRISPR-induced mutation in *FIO1*.

(A) Phenotype of *fio1-3* compared to the Col-0 wildtype when grown in LD conditions.

(B) Determination of flowering by counting the number of rosette leaves (RLN = rosette leaf number) at the bolting stage in LD. Plotted are average leaf number +/- SD, \*\*\* $p < 0.001$ , N=10-14.

(C) Nucleotide alignment showing the CRISPR-induced genomic deletion found in *fio1-5*. Gene model on top shows the relative positions of all three *fio1* mutations.
