# Supplementary material for: FIONA1-mediated methylation of the 3’UTR of FLC affects FLC transcript levels and flowering in Arabidopsis
Source: PubMed Central journal article supplement (PMC9543952; doi:10.1371/journal.pgen.1010386), 2022-09-27
Supplement: pgen.1010386.s003.pdf [file pgen.1010386.s003.pdf]

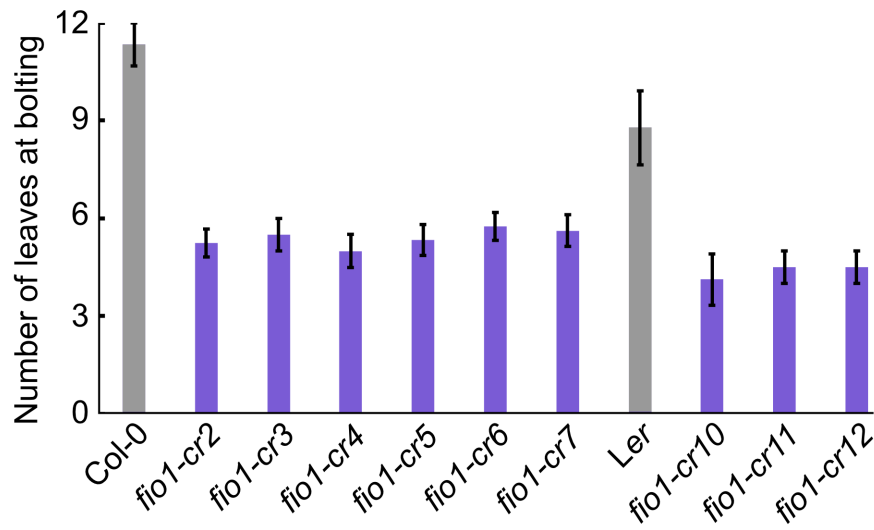

**Supplementary Figure S3 – Flowering time analysis CRISPR-induced mutations in *FIO1*.** Plants were grown in long day conditions (16h light, 8 hour dark) and the number of leaves were counted at the bolting stage. Depicted is the average +/- standard deviation. N=10
