# Supplementary material for: FIONA1-mediated methylation of the 3’UTR of FLC affects FLC transcript levels and flowering in Arabidopsis
Source: PubMed Central journal article supplement (PMC9543952; doi:10.1371/journal.pgen.1010386), 2022-09-27
Supplement: pgen.1010386.s004.pdf [file pgen.1010386.s004.pdf]

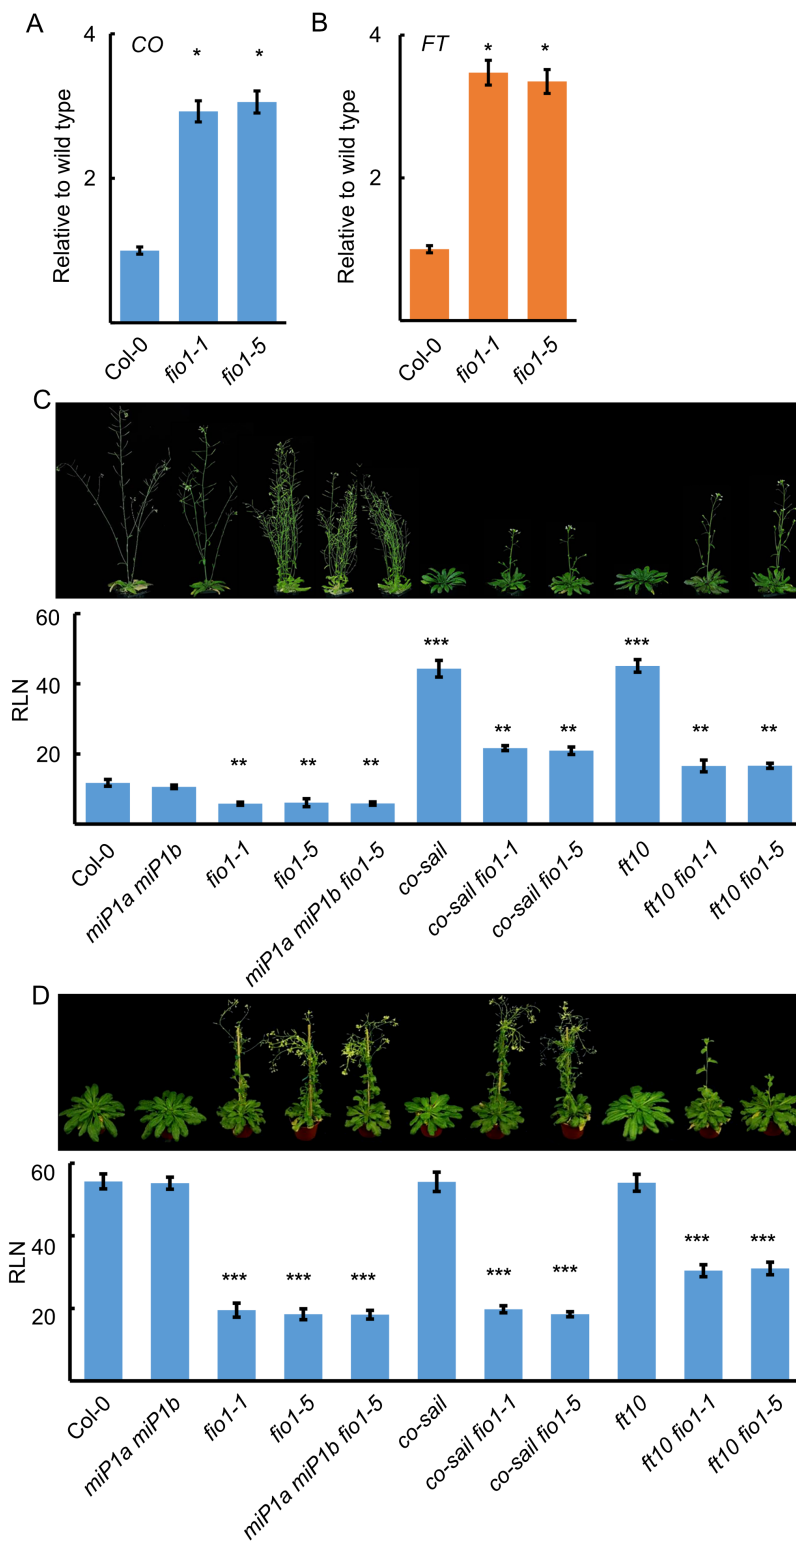

**Figure S4 – FIONA1 acts partially independent of the photoperiod pathway to repress flowering.**

**(A)** and **(B)** Quantification of *CO* and *FT* in Col-0, *fio1-1* and *fio1-5* by qRT-PCR. Values are the means  $\pm$ SD. N = 4. \* P  $\leq$  0.01.

**(C)** Phenotypes of *miP1a miP1b*, *fio1-1*, *fio1-5*, *miP1a miP1b fio1-5*, *co-sail*, *co-sail fio1-1*, *co-sail fio1-5*, *ft10*, *ft10 fio1-1*, *ft10 fio1-5* and determination of flowering time by counting the number of rosette leaves at bolting compare to wild type, under long day conditions. RLN = number of rosette leaves at the bolting stage. Values are the means  $\pm$ SD. N = 10 to 20. One-way ANOVA was carried out to test significance, \*\*P  $\leq$  0.005, \*\*\*P  $\leq$  0.001.

**(D)** Phenotypes of *miP1a miP1b*, *fio1-1*, *fio1-5*, *miP1a miP1b fio1-5*, *co-sail*, *co-sail fio1-1*, *co-sail fio1-5*, *ft10*, *ft10 fio1-1*, *ft10 fio1-5* and determination of flowering time by counting the number of rosette leaves at bolting compare to wild type, under short day conditions. RLN = number of rosette leaves at the bolting stage. Values are the means  $\pm$ SD. N = 10 to 12. One-way ANOVA was carried out to test significance, \*\*\*P  $\leq$  0.001.
