# Supplementary material for: FIONA1-mediated methylation of the 3’UTR of FLC affects FLC transcript levels and flowering in Arabidopsis
Source: PubMed Central journal article supplement (PMC9543952; doi:10.1371/journal.pgen.1010386), 2022-09-27
Supplement: pgen.1010386.s005.pdf [file pgen.1010386.s005.pdf]

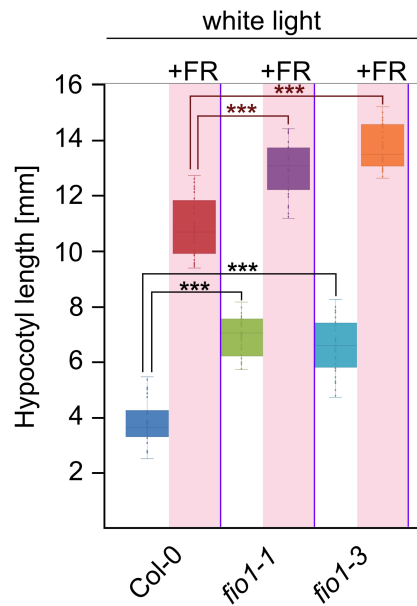

**Supplementary Figure S5 – Analysis of hypocotyl elongation in response to elevated far-red levels (shade avoidance response).** Hypocotyl length of Col-0 wildtype and *fio1-1* and *fio1-5* mutants grown in either white light conditions or in far-red light enriched white light conditions (+FR). The *fio1* mutants show a hypersensitivity response with increase hypocotyls in white light and even longer hypocotyls in shade conditions.
