# Supplementary material for: FIONA1-mediated methylation of the 3’UTR of FLC affects FLC transcript levels and flowering in Arabidopsis
Source: PLoS Genet. 2022 Sep 27;18(9):e1010386. doi: 10.1371/journal.pgen.1010386 (PMC9543952; doi:10.1371/journal.pgen.1010386)
Supplement: S3 Table — (XLSX) [file pgen.1010386.s008.xlsx]

## Sheet: Sheet1
fio1-sgRNA1F	ATTGGAGTAGTTTCAATGCGGAG
fio1-sgRNA1R	AAACCTCCGCATTGAAACTACTC
fio1-sgRNA2F	ATTGTAGTCGAGCTCGCATCGAC
fio1-sgRNA2R	AAACGTCGATGCGAGCTCGACTA
fio1-sgRNA3F	ATTGTCCTCCTTCTACATGACCA
fio1-sgRNA3R	AAACTGGTCATGTAGAAGGAGGA
fio1-sgRNA4F	ATTGGGATCATTCAAAGTTTGGG
fio1-sgRNA4R	AAACCCCAAACTTTGAATGATCC
fio1-sgRNA6F	ATTGGTCGTTTATGCCAATAGCT
fio1-sgRNA6R	AAACAGCTATTGGCATAAACGAC
fio1-sgRNA7F	ATTGTAGATAGTGTAAGAAGCCA
fio1-sgRNA7R	AAACTGGCTTCTTACACTATCTA
fio1-sgRNA8F	ATTGGATTGTTCTCCAGGGTCTT
fio1-sgRNA8R	AAACAAGACCCTGGAGAACAATC
fio1-1 genotypingF	CTCAATTTGGTGACAATGTTGTTTTGTCTGCA
fio1-1 genotypingR	AACACCGAGTAGTACAGCTGGTTC
